# Supplementary material for: The novel pleuromutilin derivative 22–((4-((4-nitrophenyl)acetamido)phenyl)thio)deoxy pleuromutilin possesses robust anti-mycoplasma activity both in vitro and in vivo
Source: Front Pharmacol. 2024 Dec 20;15:1491223. doi: 10.3389/fphar.2024.1491223 (PMC11695783; doi:10.3389/fphar.2024.1491223)
Supplement: Supplementary file 3 [file DataSheet4.XLSX]

## Sheet: IV
Rsq	Rsq_adjusted	Corr_XY	No_points_lambda_z	Lambda_z	Lambda_z_lower	Lambda_z_upper	HL_Lambda_z	Tmax	Cmax	Cmax_D	C0	Tlast	Clast	AUClast	AUCall	AUCINF_obs	AUCINF_D_obs	AUC_%Extrap_obs	AUC_%Back_Ext_obs	Vz_obs	Cl_obs	AUCINF_pred	AUCINF_D_pred	AUC_%Extrap_pred	AUC_%Back_Ext_pred	Vz_pred	Cl_pred	AUMClast	AUMCINF_obs	AUMC_%Extrap_obs	AUMCINF_pred	AUMC_%Extrap_pred	MRTlast	MRTINF_obs	MRTINF_pred	Vss_obs	Vss_pred
0.9807	0.9711	-0.9903	4	0.2748	3	8	2.5225	0.083	4180	418	7579.63	8	3.72	1441.26	1441.26	1454.8	145.48	0.9306	33.5458	0.025	0.0069	1454.56	145.457	0.9144	33.5513	0.025	0.0069	598.632	756.201	20.837	753.432	20.546	0.4154	0.5198	0.518	0.0036	0.0036
0.9891	0.9836	-0.9945	4	0.447	3	8	1.5506	0.083	5510	551	9597.07	8	0.875	1869.35	1869.35	1871.31	187.131	0.1046	33.5029	0.012	0.0053	1871.3	187.13	0.1039	33.5032	0.012	0.0053	571.014	591.051	3.3902	590.916	3.368	0.3055	0.3158	0.3158	0.0017	0.0017
0.9939	0.9877	-0.9969	3	0.2227	3	8	3.1126	0.083	3620	362	4839.8	8	2.95	1488.47	1488.47	1501.72	150.172	0.8821	23.3787	0.0299	0.0067	1501.69	150.169	0.8804	23.3791	0.0299	0.0067	599.152	764.612	21.6397	764.278	21.6055	0.4025	0.5092	0.5089	0.0034	0.0034
0.9961	0.9941	-0.998	4	0.2409	3	12	2.8768	0.083	4500	450	10091.7	12	1.36	1490.96	1490.96	1496.6	149.66	0.3771	40.4621	0.0277	0.0067	1496.6	149.66	0.3773	40.462	0.0277	0.0067	624.216	715.375	12.7428	715.413	12.7474	0.4187	0.478	0.478	0.0032	0.0032
0.9948	0.9922	-0.9974	4	0.3213	3	8	2.157	0.083	6770	677	11026.6	8	6.29	2574.6	2574.6	2594.18	259.418	0.7545	28.4699	0.012	0.0039	2594.16	259.416	0.754	28.47	0.012	0.0039	1198.03	1415.53	15.3656	1415.38	15.3562	0.4653	0.5457	0.5456	0.0021	0.0021
0.9916	0.9874	-0.9958	4	0.2795	3	8	2.4798	0.083	4820	482	7343.77	8	6.01	1716.62	1716.62	1738.12	173.812	1.237	29.0426	0.0206	0.0058	1737.96	173.796	1.2276	29.0454	0.0206	0.0058	835.77	1084.7	22.9491	1082.77	22.812	0.4869	0.6241	0.623	0.0036	0.0036
1	0.9999	-1	3	0.2788	2	8	2.4866	0.083	6270	0.0006	10935.2	8	8.25	2287.49	2287.49	2317.09	0.0002	1.2773	30.8151	15482.2	4315.76	2317.08	0.0002	1.277	30.8152	15482.3	4315.77	1103	1445.93	23.7174	1445.86	23.7133	0.4822	0.624	0.624	2693.16	2693.04
0.9921	0.9842	-0.996	3	0.2052	3	8	3.378	0.083	4140	0.0004	5541.15	8	3.84	1712.29	1712.29	1731	0.0002	1.0811	23.2101	28153.8	5777	1730.96	0.0002	1.0785	23.2107	28154.5	5777.15	704.605	945.518	25.4794	944.931	25.4331	0.4115	0.5462	0.5459	3155.55	3153.75
0.992287

## Sheet: IM
Rsq	Rsq_adjusted	Corr_XY	No_points_lambda_z	Lambda_z	Lambda_z_lower	Lambda_z_upper	HL_Lambda_z	Tlag	Tmax	Cmax	Cmax_D	Tlast	Clast	AUClast	AUCall	AUCINF_obs	AUCINF_D_obs	AUC_%Extrap_obs	Vz_F_obs	Cl_F_obs	AUCINF_pred	AUCINF_D_pred	AUC_%Extrap_pred	Vz_F_pred	Cl_F_pred	AUMClast	AUMCINF_obs	AUMC_%Extrap_obs	AUMCINF_pred	AUMC_%Extrap_pred	MRTlast	MRTINF_obs	MRTINF_pred
0.9978	0.9971	-0.9989	5	0.4701	3	12	1.4744	0	0.25	469	46.9	12	1.85	801.322	801.322	805.258	80.5258	0.4887	0.0264	0.0124	805.26	80.526	0.489	0.0264	0.0124	1845.12	1900.71	2.9249	1900.74	2.9266	2.3026	2.3604	2.3604
0.9999	0.9999	-1	4	0.3415	4	12	2.0296	0	0.25	730	73	12	6.51	1354.01	1354.01	1373.07	137.307	1.3883	0.0213	0.0073	1373.07	137.306	1.388	0.0213	0.0073	3306.46	3591.01	7.9241	3590.96	7.9228	2.442	2.6153	2.6153
0.9988	0.9975	-0.9994	3	0.2687	6	12	2.5798	0	0.33	550	55	12	5.87	1070.85	1070.85	1092.7	109.27	1.9994	0.0341	0.0092	1092.68	109.268	1.9971	0.0341	0.0092	2428.17	2771.66	12.3927	2771.26	12.3802	2.2675	2.5365	2.5362
0.9921	0.9901	-0.996	6	0.2985	2	12	2.3224	0	0.5	410	41	12	6.37	1055.33	1055.33	1076.67	107.667	1.9823	0.0311	0.0093	1076.58	107.658	1.9741	0.0311	0.0093	2771.94	3099.57	10.57	3098.18	10.53	2.6266	2.8788	2.8778
0.9935	0.9871	-0.9968	3	0.2981	6	12	2.3255	0	0.33	609	60.9	12	4.83	1188.66	1188.66	1204.87	120.487	1.3449	0.0278	0.0083	1204.84	120.484	1.3423	0.0278	0.0083	2572.51	2821.33	8.8194	2820.84	8.8035	2.1642	2.3416	2.3413
1	1	-1	3	0.3299	6	12	2.1008	0	0.17	667	66.7	12	6.04	1432.45	1432.45	1450.76	145.076	1.2619	0.0209	0.0069	1450.76	145.076	1.262	0.0209	0.0069	3306.41	3581.57	7.6827	3581.6	7.6834	2.3082	2.4688	2.4688
0.9131	0.8262	-0.9556	3	0.0998	6	12	6.9461	0	0.75	531	0.0001	12	9.7	925.896	925.896	1023.1	0.0001	9.501	97949	9774.2	1021.5	0.0001	9.3589	98102.8	9789.56	2028.62	4169.2	51.3426	4133.86	50.9267	2.191	4.0751	4.0469
0.9943	0.9929	-0.9972	6	0.2447	2	12	2.8327	0	0.25	520	0.0001	12	9.25	1050.1	1050.1	1087.9	0.0001	3.4748	37565.5	9192.03	1087.68	0.0001	3.4549	37573.3	9193.92	2585.7	3193.81	19.0405	3190.21	18.949	2.4623	2.9358	2.9331
0.986187

## Sheet: AUClast|AUCinf
IM
AUClast	801.322	1354.01	1070.85	1055.33	1188.66	1432.45	925.896	1050.1
AUCINFobs	805.258	1373.07	1092.7	1076.67	1204.87	1450.76	1023.1	1087.9	AV	SD
%	99.5113	98.6117	98.0006	98.0177	98.6551	98.7381	90.4989	96.5252	97.3198	2.88772
IV
AUClast	1441.26	1869.35	1488.47	1490.96	2574.6	1734.84	2287.49	1712.29
AUCINFobs	1454.8	1871.31	1501.72	1496.6	2594.18	1752.1	2317.09	1731	AV	SD
%	99.0694	99.8954	99.1179	99.6229	99.2455	99.0149	98.7227	98.9189	99.2009	0.383462
